# Supplementary material for: Transparent and conductive reduced graphene oxide/silver nanoparticles multilayer film obtained by electrical self-assembly process with graphene oxide sheets and silver colloid
Source: Royal Society of Chemistry journal article supplement (doi:10.1039/c2ra22256f), 2012-12-21
Supplement: c2ra22256f.pdf [file c2ra22256f.pdf]

## Supplementary Material

*Yazhou Zhou, Juan Yang\*, Xiaonong Cheng, Nan Zhao, Lei Sun, Hongbo Sun, Dan Li*

School of Materials Science and Engineering, Jiangsu University, Zhenjiang Jiangsu 212013,

China

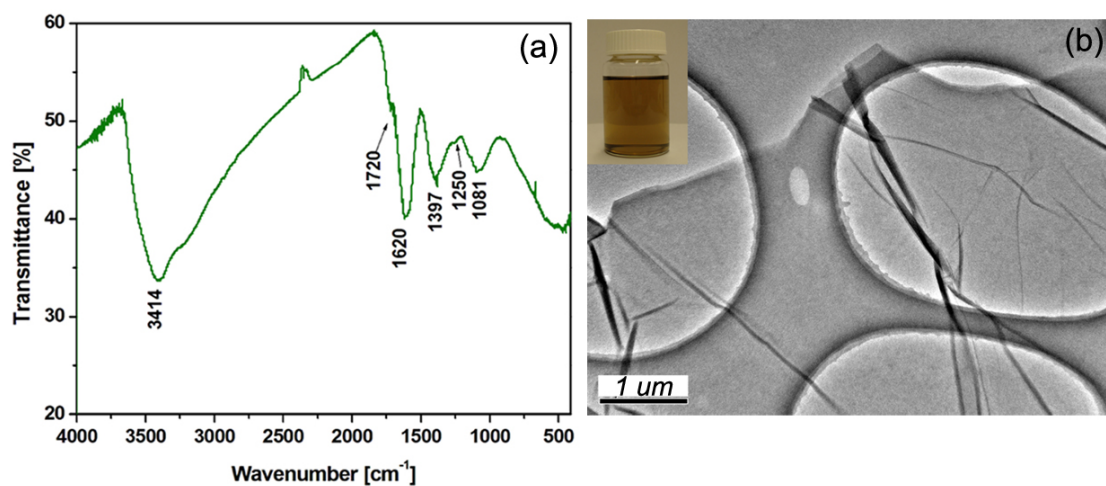

**Fig. S1. (a) FTIR spectrum of GO; (b) TEM image of GO. Inset is image taken 15 days after the ultrasonic treatment**

\* Corresponding author: Fax: +86 511 88791947.  
E-mail address: [yangjuan6347@ujs.edu.cn](mailto:yangjuan6347@ujs.edu.cn) (J. Yang).

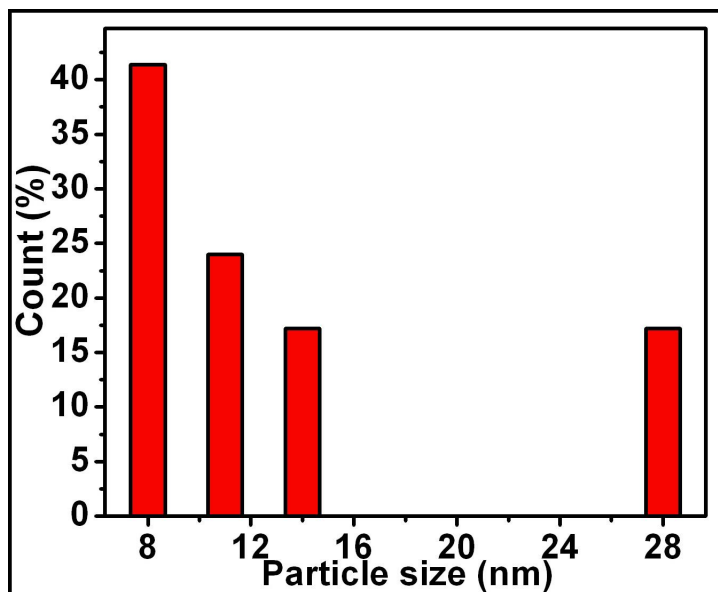

Fig S2. The particle size distribution for Ag NPs in Ag NPs colloid.

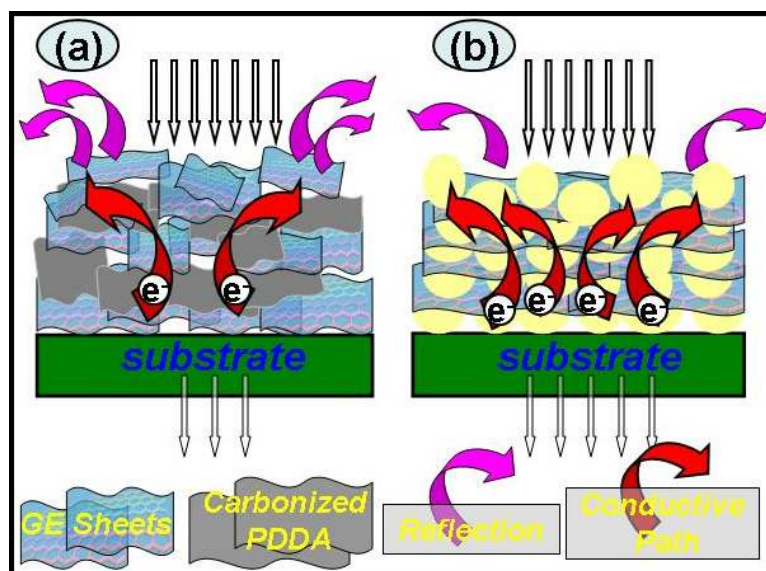

Fig S3. (a) Schematic of GE film without Ag NPs, generating pores and aggregations, which break conductive paths; (b) Films with Ag NPs can avoid restacking, aggregations, and defects, which possess favorable conductive paths and high transmission.

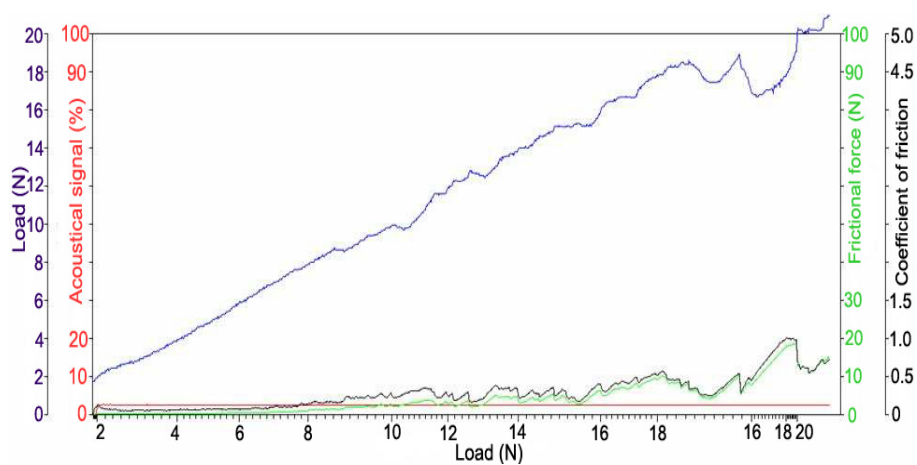

**Fig S4.** The acoustical signal, friction force and coefficient of friction as functions of load for the RGO/Ag NPs film (12-layer).
